# Supplementary material
Source: Springer Nature journal article supplement (https://www.springermedizin.de/resource/supplementary/13045_2009_72_MOESM2_ESM.pdf/9660598)

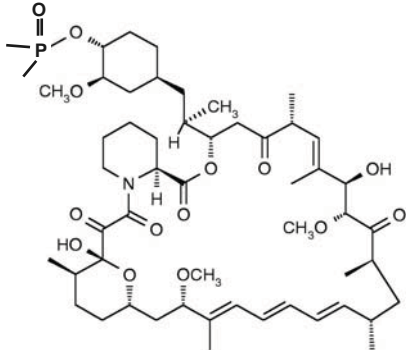

Ridaforolimus

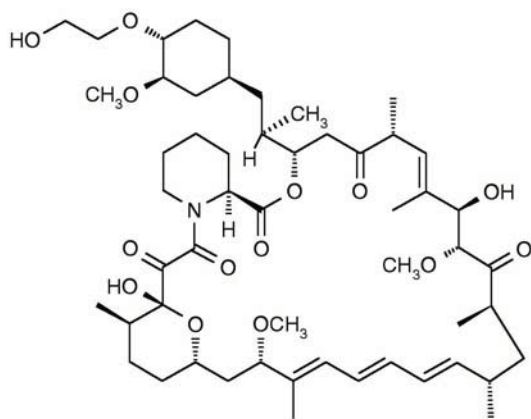

Everolimus

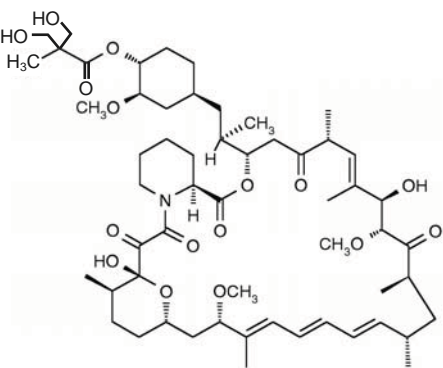

Temsirolimus

Supplement: MOESM2 [file 9660598]
